# Supplementary material for: Impact of chemotherapy and immunotherapy on the composition and function of immune cells in COVID-19 convalescent with gynecological tumors
Source: publisher site journal article supplement (doi:10.18632/aging.203739), 2021-12-04
Supplement: Supplementary file [file aging-v13i23-203739-supplementary-material-SD2.pdf]

## SUPPLEMENTARY TABLES

Supplementary Table 1. Demographic characteristics and laboratory findings of enrolled patients.

|                                                         | Normal Range | Covid-19 with cancer             |                                         |                    |                                     | Covid-19 without cancer |                               |                                         |                 | Healthy donor |       |       |
|---------------------------------------------------------|--------------|----------------------------------|-----------------------------------------|--------------------|-------------------------------------|-------------------------|-------------------------------|-----------------------------------------|-----------------|---------------|-------|-------|
| Donor                                                   |              | TC1                              | TC2                                     | TC3                | TC4                                 | Cov1                    | Cov2                          | Cov3                                    | Cov4            | HD1           | HD2   | HD3   |
| <b>Sequenced cell number</b>                            |              | 11271                            | 9867                                    | 9866               | 8586                                | 9455                    | 9454                          | 11621                                   | 9144            | 10303         | 11143 | 11088 |
| <b>Characteristics</b>                                  |              |                                  |                                         |                    |                                     |                         |                               |                                         |                 |               |       |       |
| Age (years)                                             |              | 41                               | 26                                      | 65                 | 60                                  | 57                      | 59                            | 74                                      | 59              | 36            | 43    | 29    |
| Sex                                                     |              | F                                | F                                       | F                  | F                                   | F                       | F                             | F                                       | M               | F             | F     | F     |
| Tumor type                                              |              | Cervical squamous cell carcinoma | Ovarian hypercalcemic small cell cancer | Endometrial cancer | Endometrial cancer                  | NA                      | NA                            | NA                                      | NA              | NA            | NA    | NA    |
| Stage                                                   |              | IIB                              | IC                                      | IV                 | IIIa                                | NA                      | NA                            | NA                                      | NA              | NA            | NA    | NA    |
| Comorbidity                                             |              | NA                               | NA                                      | NA                 | NA                                  | NA                      | Otitis media                  | hypertension, diabetes, Thyroid nodules | NA              | NA            | NA    | NA    |
| Symptoms onset                                          |              | cough                            | Fever, Cough                            | Fever, cough       | fever, emesis, stomachache, fatigue | Fever                   | Fever, cough, chills, fatigue | Fever                                   | Fever, Diarrhea | NA            | NA    | NA    |
| Diagnosis                                               |              | serological                      | PCR                                     | PCR                | PCR                                 | CT                      | PCR                           | PCR                                     | CT              | NA            | NA    | NA    |
| Severity                                                |              | mild                             | severe                                  | critical           | severe                              | severe                  | moderate                      | critical                                | moderate        | NA            | NA    | NA    |
| Sample days from negative nucleic acid, days            |              | 71                               | 62                                      | 95                 | 55                                  | NA                      | 87                            | 66                                      | NA              | NA            | NA    | NA    |
| <b>Tumor maker</b>                                      |              |                                  |                                         |                    |                                     |                         |                               |                                         |                 |               |       |       |
| Neuron specific enolase, NSE, µg/L                      | <16.3        | NA                               | 7.92                                    | NA                 | NA                                  | NA                      | NA                            | NA                                      | NA              | NA            | NA    | NA    |
| Alpha-fetoprotein (AFP), ng/ml                          | ≤7.0         | NA                               | 2.29                                    | 3.89               | 4.03                                | NA                      | NA                            | NA                                      | NA              | NA            | NA    | NA    |
| Carcinoembryonic antigen (CEA), ng/ml                   | ≤5.0         | NA                               | NA                                      | 5.87               | 0.717                               | NA                      | NA                            | NA                                      | NA              | NA            | NA    | NA    |
| squamous cell carcinoma associated antigen (SCC), ng/ml | ≤1.5         | NA                               | NA                                      | 2.2                | NA                                  | NA                      | NA                            | NA                                      | NA              | NA            | NA    | NA    |
| Carbohydrate antigen 199 (CA199), U/ml                  | ≤34          | NA                               | NA                                      | 13.73              | 10.09                               | NA                      | NA                            | NA                                      | NA              | NA            | NA    | NA    |
| Carbohydrate antigen 125 (CA125), U/ml                  | ≤35          | NA                               | NA                                      | NA                 | 19.5                                | NA                      | NA                            | NA                                      | NA              | NA            | NA    | NA    |
| Carbohydrate antigen 153 (CA153), U/ml                  | ≤31.3        | NA                               | NA                                      | 22.5               | NA                                  | NA                      | NA                            | NA                                      | NA              | NA            | NA    | NA    |
| Human epididymis protein 4 (HE4), pmol/ml               | ≤140         | NA                               | NA                                      | 97.3               | 71.3                                | NA                      | NA                            | NA                                      | NA              | NA            | NA    | NA    |
| <b>Inflammation factors</b>                             |              |                                  |                                         |                    |                                     |                         |                               |                                         |                 |               |       |       |
| IL-6                                                    |              | NA                               | 12.87                                   | 12.93              | <1.5                                | <1.5                    | <1.5                          | 5.56                                    | 17.12           | <1.5          | <1.5  | <1.5  |
| TNF-α                                                   |              | 6.2                              | <4                                      | <4                 | 12.1                                | NA                      | 23.5                          | 4.9                                     | 10.8            | <4            | <4    | <4    |

**Supplementary Table 2. Laboratory findings of COVID-19 patients receiving anti-tumor treatment.**

|                                                         | <b>Normal Range</b> | <b>TC1</b> |       |       | <b>TC2</b> |       | <b>TC3</b> |       |
|---------------------------------------------------------|---------------------|------------|-------|-------|------------|-------|------------|-------|
| <b>Donor</b>                                            |                     | TC1-1      | TC1-2 | TC1-3 | TC2-1      | TC2-2 | TC3-1      | TC3-2 |
| <b>Sequenced cell number</b>                            |                     | 11271      | 9537  | 6505  | 9867       | 12051 | 9866       | 8130  |
| <b>Blood routine</b>                                    |                     |            |       |       |            |       |            |       |
| leukocyte, × 10 <sup>9</sup> /L                         | 3.50–9.50           | 7.59       | 7.17  | 6.62  | 8.95       | 4.95  | 6.52       | 5.66  |
| neutrophil, %                                           | 40.0–75.0           | 72.5       | 54.5  | 60.1  | 69.3       | 72.1  | 76.9       | 76.5  |
| neutrophil, × 10 <sup>9</sup> /L                        | 1.80–6.30           | 5.5        | 3.91  | 3.98  | 6.2        | 3.57  | 5.02       | 4.33  |
| lymphocyte, %                                           | 20.0–50.0           | 19.2       | 36.7  | 32.5  | 18.4       | 16.4  | 18.7       | 14.8  |
| lymphocyte, × 10 <sup>9</sup> /L                        | 1.10–3.20           | 1.46       | 2.63  | 2.15  | 1.65       | 0.81  | 1.22       | 0.84  |
| monocyte, %                                             | 3.0–10.0            | 7.5        | 7     | 6.6   | 11.3       | 10.7  | 4          | 7.6   |
| monocyte, × 10 <sup>9</sup> /L                          | 0.10–0.60           | 0.5        | 0.5   | 0.44  | 1.01       | 0.53  | 0.26       | 0.43  |
| eosinophil, %                                           | 0.4–8.0             | 0.7        | 1.5   | 0.6   | 0.9        | 0.4   | 0.2        | 0.9   |
| eosinophil, × 10 <sup>9</sup> /L                        | 0.02–0.52           | 0.05       | 0.11  | 0.04  | 0.08       | 0.02  | 0.01       | 0.05  |
| basophilic granulocyte, %                               | 0.0–1.0             | 0.1        | 0.3   | 0.2   | 0.1        | 0.4   | 0.2        | 0.2   |
| basophilic granulocyte, × 10 <sup>9</sup> /L            | 0.00–0.10           | 0.01       | 0.02  | 0.01  | 0.01       | 0.02  | 0.01       | 0.01  |
| PLT, × 10 <sup>9</sup> /L                               | 125.0–350.0         | 343        | 265   | 228   | 384        | 431   | 157        | 142   |
| <b>Blood biochemistry</b>                               |                     |            |       |       |            |       |            |       |
| ALT, U/L                                                | ≤33                 | 8          | 8     | 9     | 11         | 15    | 7          | 9     |
| AST, U/L                                                | ≤32                 | 14         | 17    | 14    | 16         | 14    | 14         | 13    |
| CR, umol/L                                              | 45–84               | 54         | 43    | 48    | 89         | 70    | 58         | 60    |
| BUN, mmol/L                                             | 2.6–7.5             | 3.4        | 1.6   | 4.5   | 3.6        | 4.2   | 6.04       | 6.4   |
| <b>Tumor maker</b>                                      |                     |            |       |       |            |       |            |       |
| Alpha-fetoprotein (AFP), ng/ml                          | ≤7.0                | NA         | NA    | NA    | NA         | 1.85  | NA         | NA    |
| Carcinoembryonic antigen (CEA), ng/ml                   | ≤5.0                | NA         | NA    | NA    | NA         | 2.57  | NA         | NA    |
| squamous cell carcinoma associated antigen (SCC), ng/ml | ≤1.5                | 0.4        | NA    | 0.6   | NA         | 0.91  | NA         | NA    |
| Carbohydrate antigen 199 (CA199), U/ml                  | ≤34                 | NA         | NA    | NA    | NA         | 28.34 | NA         | NA    |
| Carbohydrate antigen 125 (CA125), U/ml                  | ≤35                 | NA         | NA    | NA    | 9.5        | 7.59  | 8.4        | NA    |
| Human epididymis protein 4 (HE4), pmol/ml               | ≤140                | NA         | NA    | NA    | 46.9       | 110.9 | NA         | NA    |
| Serum antibody to SARS-CoV-2                            |                     |            |       |       |            |       |            |       |
| IgG, U/ml                                               | <1.0                | 17.5       | NA    | 5.5   | 9.79       | NA    | 19.5       | NA    |
| IgM, U/ml                                               | <1.0                | 0.62       | NA    | 0.7   | NA         | NA    | 0.39       | NA    |
